# Supplementary material for: Manganese Dioxide Nanoparticles Prepared by Laser Ablation as Materials with Interesting Electronic, Electrochemical, and Disinfecting Properties in Both Colloidal Suspensions and Deposited on Fluorine-Doped Tin Oxide
Source: MDPI journal article supplement (doi:10.3390/nano12224061), 2022-11-18

*Supporting Information*

**Manganese dioxide nanoparticles prepared by laser ablation as materials with interesting electronic, electrochemical, and disinfecting properties in both colloidal suspensions and deposited on fluorine-doped tin oxide**

**Jhonatan Corrales<sup>1</sup>, Jorge Acosta-Vergara<sup>2</sup>, Sandra Castro<sup>3</sup>, Henry Riascos<sup>4</sup>,  
Efraím Serna- Galvis<sup>5</sup>, Ricardo Torres- Palma<sup>5</sup>, Yenny Ávila- Torres<sup>\*5</sup>**

- <sup>1</sup> Maestría en Ciencias Químicas, Facultad de Tecnologías, Universidad Tecnológica de Pereira, Pereira, Colombia.
- <sup>2</sup> Department of Macromolecular Compounds, Faculty of Chemistry, Lomonosov Moscow State University MSU, Russia, 119991, Moscow 1, GSP-1, 1-3 Leninskiye Gory
- <sup>3</sup> Universidad Santiago de Cali, Pampalinda, Santiago de Cali, 760035, Colombia.
- <sup>4</sup> Grupo de ablación láser, Universidad Tecnológica de Pereira, Barrio la Julita. Pereira, Colombia.
- <sup>5</sup> Grupo de Investigación en Remediación Ambiental y Biocatálisis (GIRAB), Instituto de Química, Facultad de Ciencias Exactas y Naturales, Universidad de Antioquia UdeA, Calle 70 No. 52-21, Medellín, Colombia; Correspondence: yenny.avila@udea.edu.co, ricardo.torres@udea.edu.co

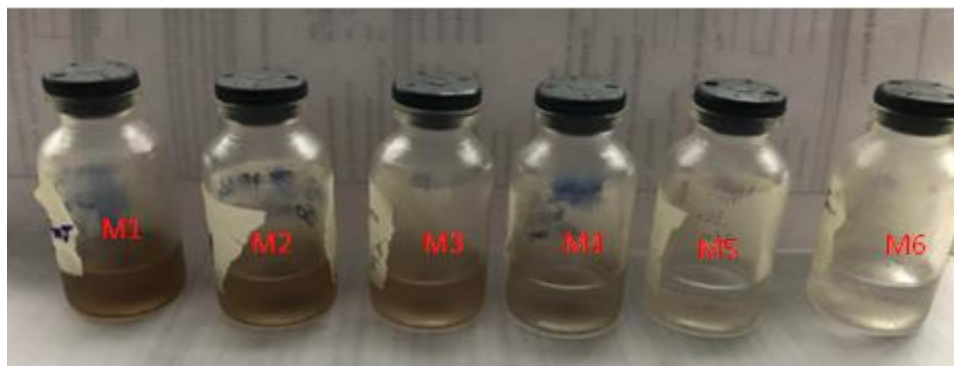

**Figure S1.** MnO<sub>2</sub> Nps in Methanol; in where are describe as:  
M1: 80mJ, 10min; M2: 80mJ, 5 min; M3: 50mJ, 10 min; M4: 50mJ, 5 min; M5: 25mJ, 10 min;  
M6: 25mJ, 5 min).

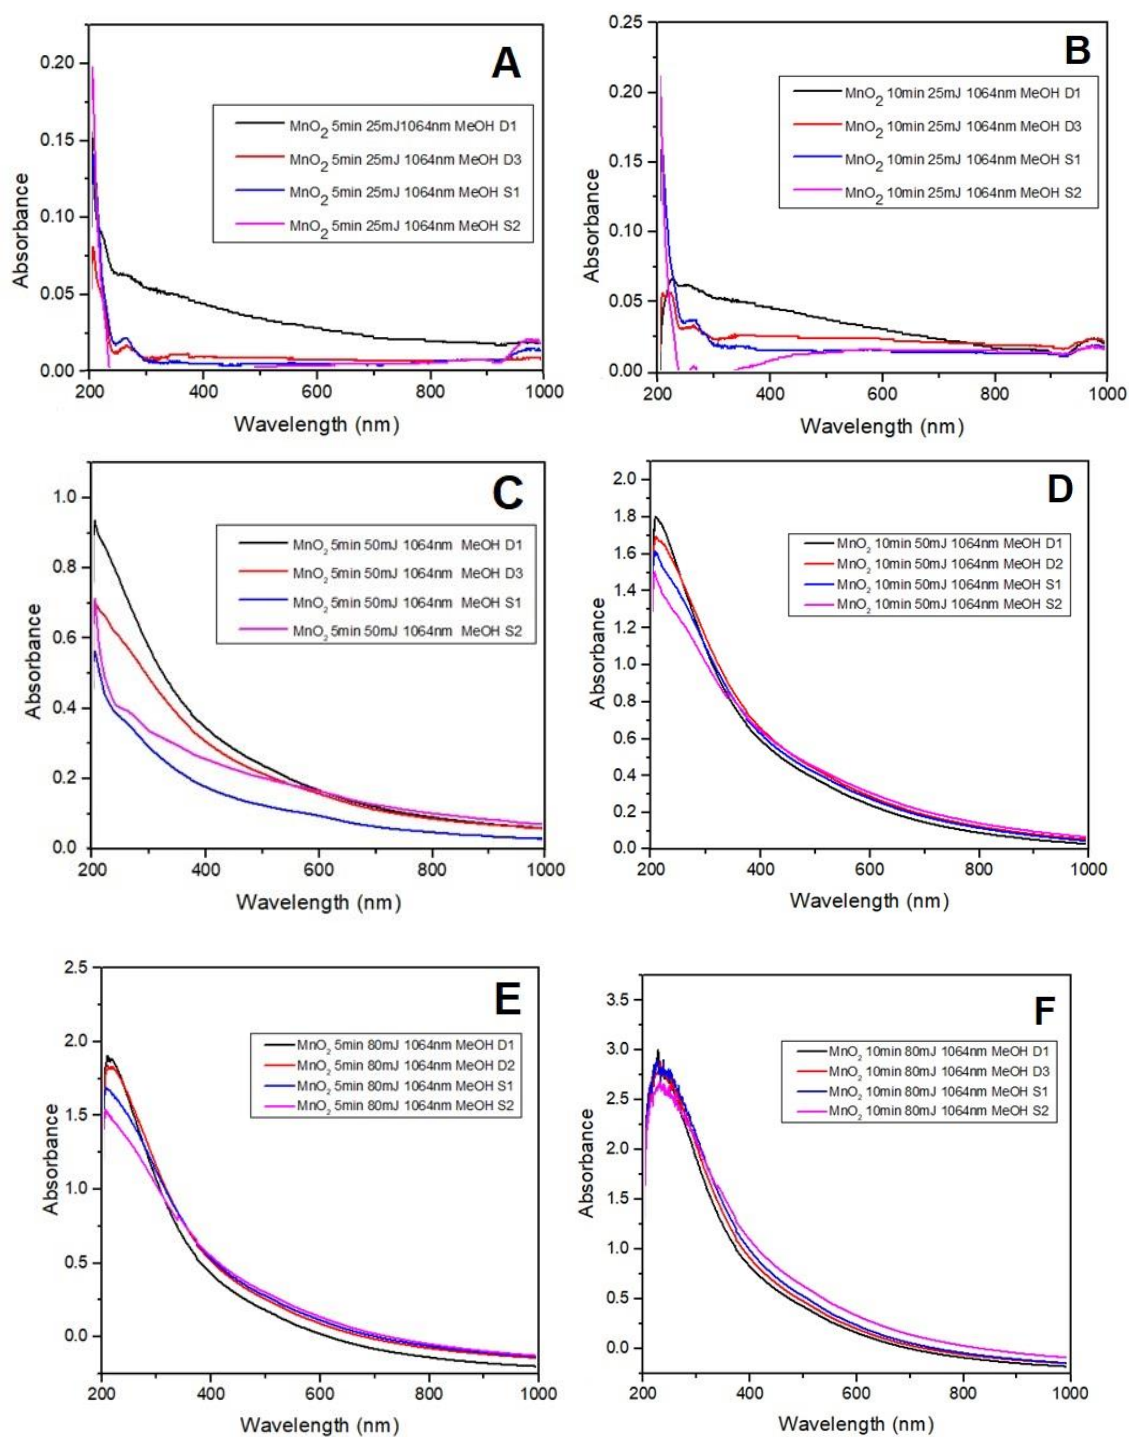

**Figure S2.** Electronic properties for  $\text{MnO}_2$  NPs at different times. Laser ablation (1064 nm).

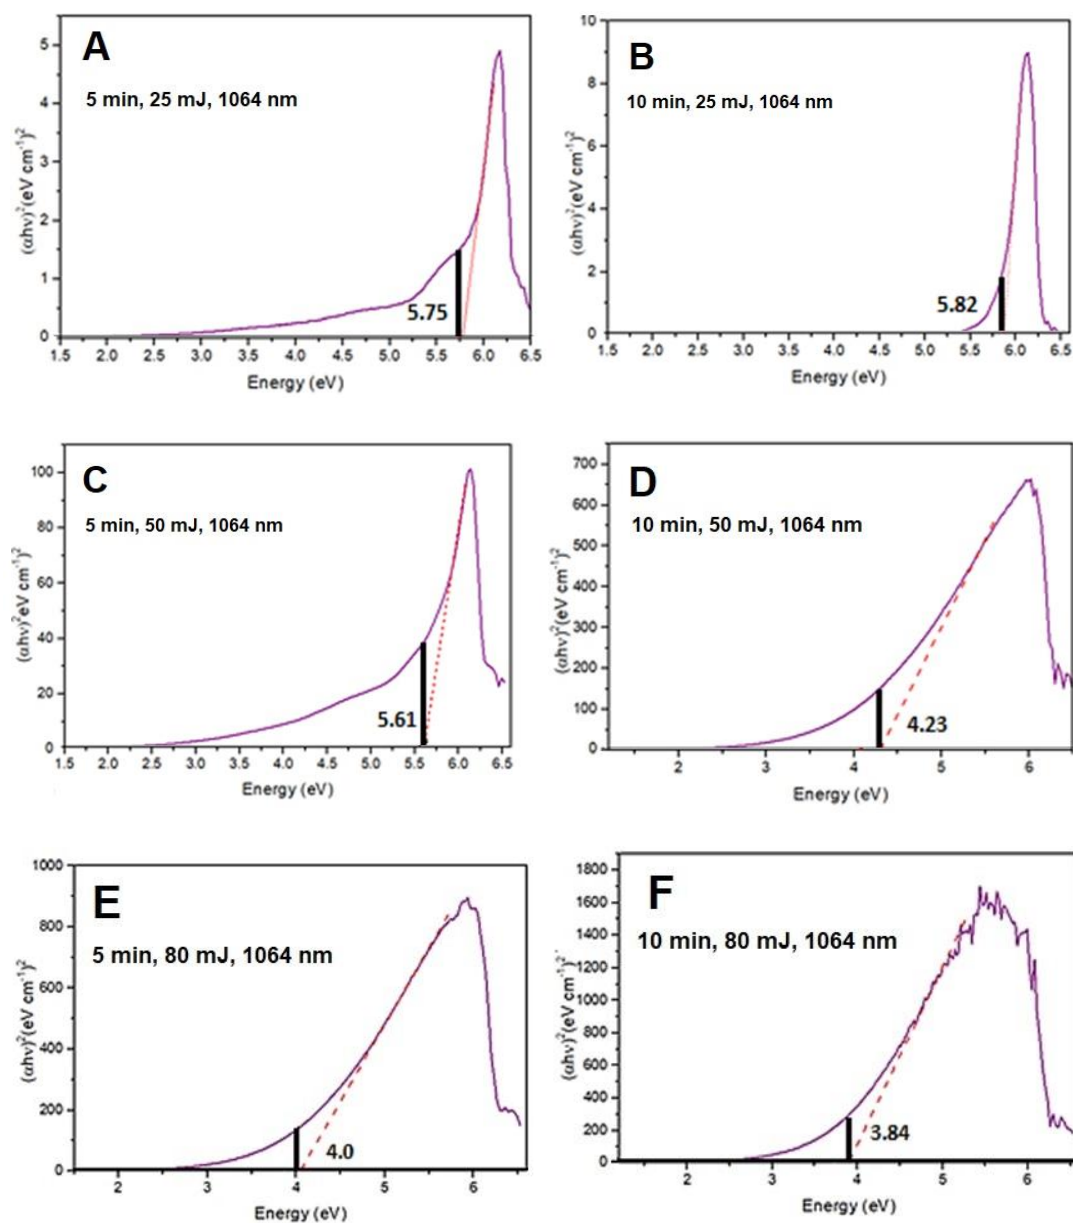

**Figure S3.** GAP determination for NPs MnO<sub>2</sub> at different times and energies.

## Sample MnO<sub>2</sub>

8/11/2022 4:01:17 PM

Spectrum processing:  
Peaks possibly omitted: 1.488, 2.145, 3.698, 9.694 keV

Processing option: All elements analyzed (Normalized)  
Number of iterations = 2

Standard:  
O SiO<sub>2</sub> 1-Jun-1999 12:00 AM  
Mn Mn 1-Jun-1999 12:00 AM

| Element | Weight% | Atomic% |
|---------|---------|---------|
| O K     | 79.32   | 52.77   |
| Mn K    | 20.68   | 47.23   |
| Totals  | 100.00  |         |

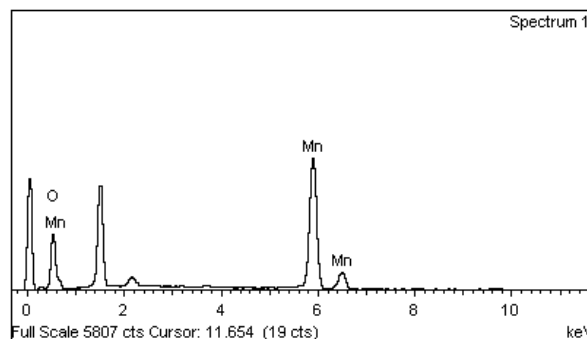

**Figure S4.** Element distribution map (EDX) of MnO<sub>2</sub> for SEM micrograph.

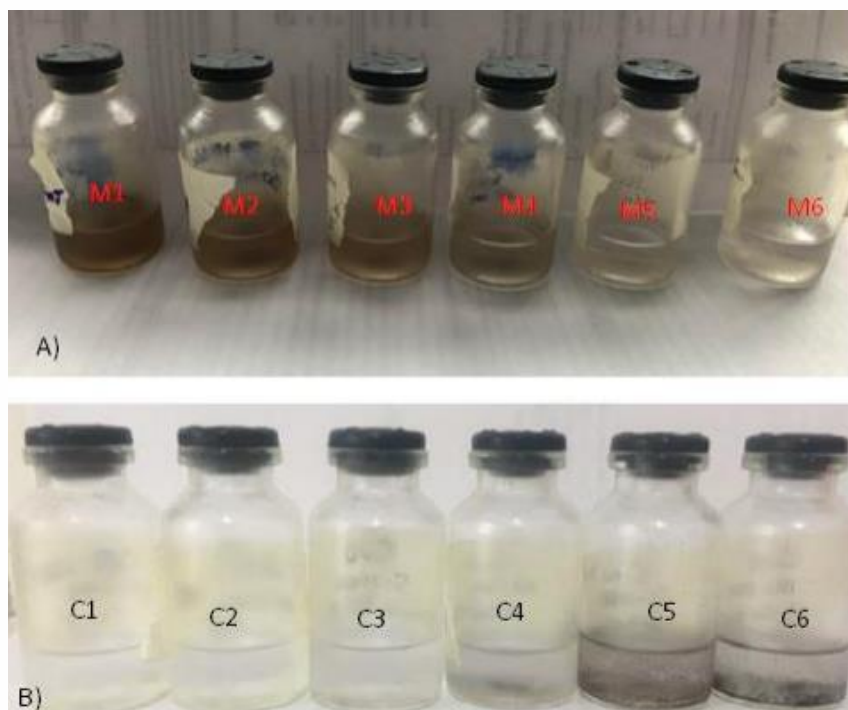

**Figure S5.** Evidence of color change in suspended Nps from MnO<sub>2</sub> (M1: 80mJ, 10min; M2: 80mJ, 5 min; M3: 50mJ, 10 min; M4: 50mJ, 5 min; M5: 25mJ, 10 min; M6: 25mJ, 5 min) after reduction to Mn<sup>3+</sup> for electrochromic analyses.

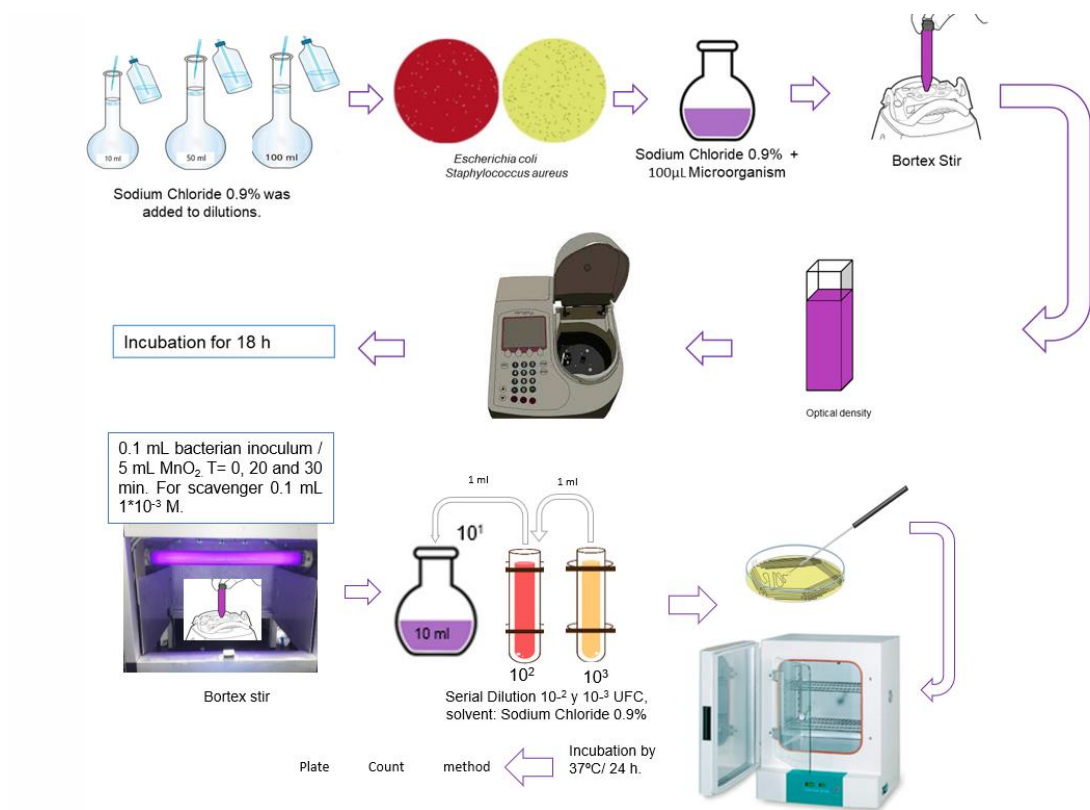

**Figure S6.** Flow chart of the preparation of the material MnO<sub>2</sub> sterilization mechanism

**Table S1.** Ventages in top down and bottom-up methods for synthesis of nanoparticles

| Top down methods   |                                        |                                                                                                                                       | Bottom-up methods   |                                                        |                                                                                                                                                                                                 |
|--------------------|----------------------------------------|---------------------------------------------------------------------------------------------------------------------------------------|---------------------|--------------------------------------------------------|-------------------------------------------------------------------------------------------------------------------------------------------------------------------------------------------------|
|                    |                                        | Ventages                                                                                                                              |                     |                                                        | Ventages                                                                                                                                                                                        |
| Mechanical milling | Ball milling<br>Mechanochemical method | Enabling chemical reactions in the absence of solvents, therefore resulting in a cleaner synthetic procedure. Obtaining products that | Solid state methods | Physical vapor deposition<br>Chemical vapor deposition | Particle properties of nanostructures such as surface morphology and crystal structure can be controlled.<br><br>Chemical vapor deposition method of coating exhibits the high film durability. |

|   |                |                                                                                                                                                                                                                                                                                                                                                                |  |                                                                                                                                        |                                                                                                                                                                                                                                                                                                                                       |
|---|----------------|----------------------------------------------------------------------------------------------------------------------------------------------------------------------------------------------------------------------------------------------------------------------------------------------------------------------------------------------------------------|--|----------------------------------------------------------------------------------------------------------------------------------------|---------------------------------------------------------------------------------------------------------------------------------------------------------------------------------------------------------------------------------------------------------------------------------------------------------------------------------------|
|   |                | are difficult or impossible to obtain in the presence of bulk solvents, and expanding the scope of chemical reactions to slightly soluble or inert starting materials.                                                                                                                                                                                         |  |                                                                                                                                        | <p>This method is easy to scale-up.</p> <p>Produces nanoparticles of controlled surface morphology.</p>                                                                                                                                                                                                                               |
| 2 | Laser ablation | <p>It is easy to obtain multi-component film that is of the desired stoichiometric ratio by PLD.</p> <p>It has high deposition rate, short test period and low substrate temperature requirements.</p> <p>Films prepared by laser ablation are uniform.</p> <p>The process is simple and flexible with great development potential and great compatibility</p> |  | <p>Liquid state synthesis methods: Sol gel methods</p> <p>Chemical reduction</p> <p>Hydrothermal method</p> <p>Solvothermal method</p> | <p>Simple method for the formation of thin metal films.</p> <p>Particle size and morphology is possible to control by systematic monitoring of reaction parameters</p> <p>Desired size and shape nanoparticle can be prepared.</p> <p>Well-crystallized powder can be formed.</p> <p>Produce nanocrystal with high crystallinity.</p> |

|   |            |                                                                                                                                                                                                                                                                                                                                                                                                                                                                     |  |                                                        |                                                          |
|---|------------|---------------------------------------------------------------------------------------------------------------------------------------------------------------------------------------------------------------------------------------------------------------------------------------------------------------------------------------------------------------------------------------------------------------------------------------------------------------------|--|--------------------------------------------------------|----------------------------------------------------------|
|   |            | <p>Process parameters can be arbitrarily adjusted, and there is no limit to the type of targets.</p> <p>Multi-target components are flexible, and it is easy to prepare multilayer films and heterojunctions.</p> <p>It is easy to clean and can prepare a variety of thin film materials.</p> <p>Use UV pulsed laser of high photon capability and high energy density as the energy source for plasma generation, so it is non-polluting and easy to control.</p> |  |                                                        |                                                          |
| 3 | Sputtering | The composition of sputtered material is not altered and remains same                                                                                                                                                                                                                                                                                                                                                                                               |  | Gas phase methods<br>Spray pyrolysis<br>Laser ablation | <p>Relatively simple method.</p> <p>Low cost method.</p> |

|  |  |                                                                                                                                                                                                                                                                                                                                                                                                                                                                                    |  |                 |                                                       |
|--|--|------------------------------------------------------------------------------------------------------------------------------------------------------------------------------------------------------------------------------------------------------------------------------------------------------------------------------------------------------------------------------------------------------------------------------------------------------------------------------------|--|-----------------|-------------------------------------------------------|
|  |  | <p>as that of the target material. Method of choice for refractory metals and intermetallic compounds than other methods like evaporation and laser ablation.</p> <p>Economical method as the sputtering equipment is less expensive than electron-beam lithography systems.</p> <p>Less impurities are generated than those created by chemical methods.</p> <p>Alloy nanoparticles can be produced with easier control on composition than other chemical reduction methods.</p> |  | Flame pyrolysis | The particle size can be controlled and reproducible. |
|--|--|------------------------------------------------------------------------------------------------------------------------------------------------------------------------------------------------------------------------------------------------------------------------------------------------------------------------------------------------------------------------------------------------------------------------------------------------------------------------------------|--|-----------------|-------------------------------------------------------|



|  |  |                                                                                                                                                                                                                                                                                                                                                |  |  |  |
|--|--|------------------------------------------------------------------------------------------------------------------------------------------------------------------------------------------------------------------------------------------------------------------------------------------------------------------------------------------------|--|--|--|
|  |  | <p>This method is a versatile technique to synthesize ionic nanoparticles with spacious sizes and compositions that are not obtainable in solution.</p> <p>Slow deposition of heavier ions or mass-selected ions gives unparalleled control of different parameters such as size, composition and charges of ions deposited onto surfaces.</p> |  |  |  |
|--|--|------------------------------------------------------------------------------------------------------------------------------------------------------------------------------------------------------------------------------------------------------------------------------------------------------------------------------------------------|--|--|--|

**Table S2.** Photocatalytic process for bacteria inactivation using NPs for t= 20 min (suspension, deposited) and 30 min (deposited) of photocatalytic treatment, Units Log UFC

| Method              |               | Control BK      | Interaction UV | Visible Photolysis | Adsorption | MnO <sub>2</sub> (UV) | MnO <sub>2</sub> (VIS) |      |
|---------------------|---------------|-----------------|----------------|--------------------|------------|-----------------------|------------------------|------|
| Exposition T=20 min | Suspension    | <i>E.Coli</i>   | 2.82           | 2.54               | 2.48       | 1.78                  | 1.08                   | 1.69 |
|                     | Nps           | <i>S.Aureus</i> | 2.85           | 2.60               | 2.47       | 1.85                  | 1.67                   | 1.39 |
|                     | Deposited NPs | <i>E.Coli</i>   | 2.82           | 2.29               | 2.52       | 2.16                  | 0.69                   | 1.50 |
|                     |               | <i>S.Aureus</i> | 2.85           | 2.53               | 2.37       | 2.36                  | 1.38                   | 1.25 |
| Exposition T=30 min | Deposited Nps | <i>Method</i>   | Control BK     | Interaction UV     | Adsorption | MnO <sub>2</sub> /UVA |                        |      |

|                 |      |      |      |     |
|-----------------|------|------|------|-----|
| <i>E.Coli</i>   | 2.82 | 0.93 | 0.49 | 0   |
| <i>S.Aureus</i> | 2.85 | 1.2  | 0.66 | 0.3 |

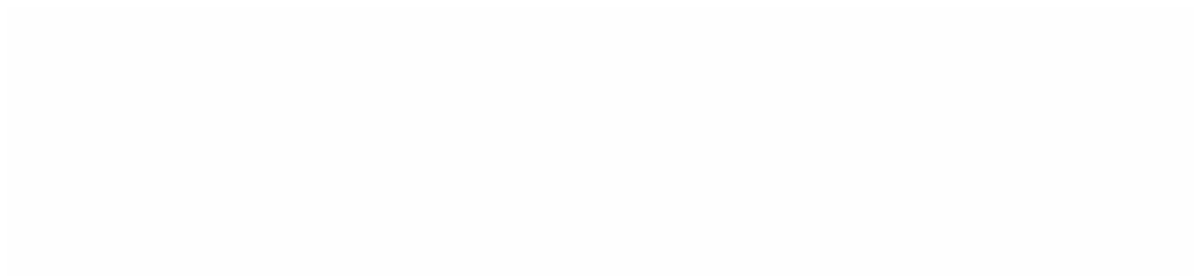

Supplement: s1 [file s1]
